# Supplementary material
Source: PubMed Central journal article supplement (PMC5558040)
Supplement: NIHMS890130-supplement-supplement_1.pdf [file NIHMS890130-supplement-supplement_1.pdf]

# Clinical Cancer Research

## Image Analysis–based Assessment of PD-L1 and Tumor-Associated Immune Cells Density Supports Distinct Intratumoral Microenvironment Groups in Non–small Cell Lung Carcinoma Patients

Edwin R. Parra, Carmen Behrens, Jaime Rodriguez-Canales, et al.

*Clin Cancer Res* 2016;22:6278-6289. Published OnlineFirst June 1, 2016.

**Updated version** Access the most recent version of this article at:  
doi:[10.1158/1078-0432.CCR-15-2443](https://doi.org/10.1158/1078-0432.CCR-15-2443)

**Supplementary Material** Access the most recent supplemental material at:  
<http://clincancerres.aacrjournals.org/content/suppl/2016/06/01/1078-0432.CCR-15-2443.DC1>

**Cited articles** This article cites 47 articles, 12 of which you can access for free at:  
<http://clincancerres.aacrjournals.org/content/22/24/6278.full.html#ref-list-1>

**Citing articles** This article has been cited by 1 HighWire-hosted articles. Access the articles at:  
</content/22/24/6278.full.html#related-urls>

**E-mail alerts** [Sign up to receive free email-alerts](#) related to this article or journal.

**Reprints and Subscriptions** To order reprints of this article or to subscribe to the journal, contact the AACR Publications Department at [pubs@aacr.org](mailto:pubs@aacr.org).

**Permissions** To request permission to re-use all or part of this article, contact the AACR Publications Department at [permissions@aacr.org](mailto:permissions@aacr.org).

**Supplementary Table 1.** Correlation of airflow limitation (positive and negative) with PD-L1 H-score and median TAIC density by mm<sup>2</sup> in the intratumoral and peritumoral compartments in lung ADC and SqCC specimens

| Immune Marker                                           | Airflow Limitation |          |            |          |          |            |
|---------------------------------------------------------|--------------------|----------|------------|----------|----------|------------|
|                                                         | ADC                |          |            | SQC      |          |            |
|                                                         | Negative           | Positive | <i>P</i> * | Negative | Positive | <i>P</i> * |
| PD-L1 (MCs)                                             | 1.1                | 1.44     | 0.048      | 0.76     | 1.20     | 0.211      |
| PD-L1 (five 1-mm <sup>2</sup> areas of tumor specimens) | 19.15              | 30.78    | 0.014      | 25.37    | 37.26    | 0.188      |
| PD-L1 (TMA)                                             | 42.24              | 40.28    | 0.852      | 31.00    | 40.06    | 0.261      |
| PD-L1 (TAMs)                                            | 15.33              | 27.19    | 0.096      | 50.31    | 47.50    | 0.688      |
| PD-L1 (mRNA)                                            | 4.4                | 4.79     | 0.145      | 4.31     | 4.30     | 1.000      |
| Intratumoral                                            |                    |          |            |          |          |            |
| CD3                                                     | 1234.00            | 1517.20  | 0.184      | 1112.60  | 1123.80  | 0.548      |
| CD4                                                     | 1265.80            | 1131.80  | 0.724      | 824.20   | 828.40   | 0.666      |
| CD8                                                     | 690.80             | 834.20   | 0.099      | 755.00   | 720.20   | 0.640      |
| CD57                                                    | 363.00             | 375.60   | 0.554      | 176.80   | 269.20   | 0.101      |
| Granzyme B                                              | 199.50             | 364.40   | 0.023      | 250.00   | 298.00   | 0.103      |
| CD45RO                                                  | 801.40             | 741.80   | 0.554      | 818.90   | 851.40   | 0.401      |
| PD-1                                                    | 428.80             | 598.40   | 0.128      | 494.20   | 501.80   | 0.841      |
| FOXP3                                                   | 309.50             | 399.33   | 0.047      | 275.00   | 326.60   | 0.231      |
| CD68                                                    | 286.70             | 291.71   | 0.717      | 172.69   | 194.47   | 0.738      |
| Peritumoral                                             |                    |          |            |          |          |            |
| CD3                                                     | 1428.20            | 1844.10  | 0.012      | 2183.80  | 2059.00  | 0.548      |
| CD4                                                     | 1318.60            | 1583.80  | 0.014      | 1672.40  | 1636.60  | 0.750      |
| CD8                                                     | 858.10             | 1138.30  | 0.023      | 1292.40  | 1645.60  | 0.313      |
| CD57                                                    | 399.40             | 500.33   | 0.115      | 408.20   | 579.00   | 0.162      |
| Granzyme B                                              | 362.10             | 567.80   | 0.001      | 483.30   | 517.80   | 0.321      |
| CD45RO                                                  | 926.20             | 1220.08  | 0.005      | 1631.20  | 1725.60  | 0.718      |
| PD-1                                                    | 948.70             | 921.30   | 0.492      | 873.60   | 892.20   | 0.616      |
| FOXP3                                                   | 380.73             | 468.20   | 0.103      | 516.30   | 636.20   | 0.056      |
| CD68                                                    | 428.50             | 410.65   | 0.805      | 371.14   | 441.29   | 0.835      |

\* Wilcoxon rank-sum test and Kruskal-Wallis test.
